# Supplementary material for: The circRNA circIFI30 promotes progression of triple-negative breast cancer and correlates with prognosis
Source: publisher site journal article supplement (doi:10.18632/aging.103311), 2020-06-04
Supplement: Supplementary file [file aging-v12i11-103311-supplementary-material-SD1.pdf]

SUPPLEMENTARY FIGURES

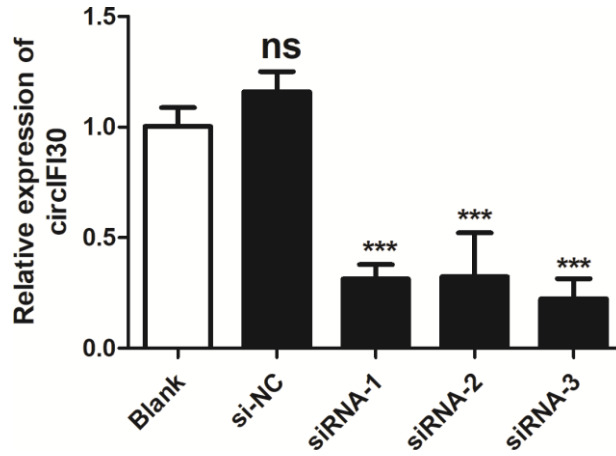

Supplementary Figure 1. The efficiency of circIFI30 siRNA was evaluated by qRT-PCR.

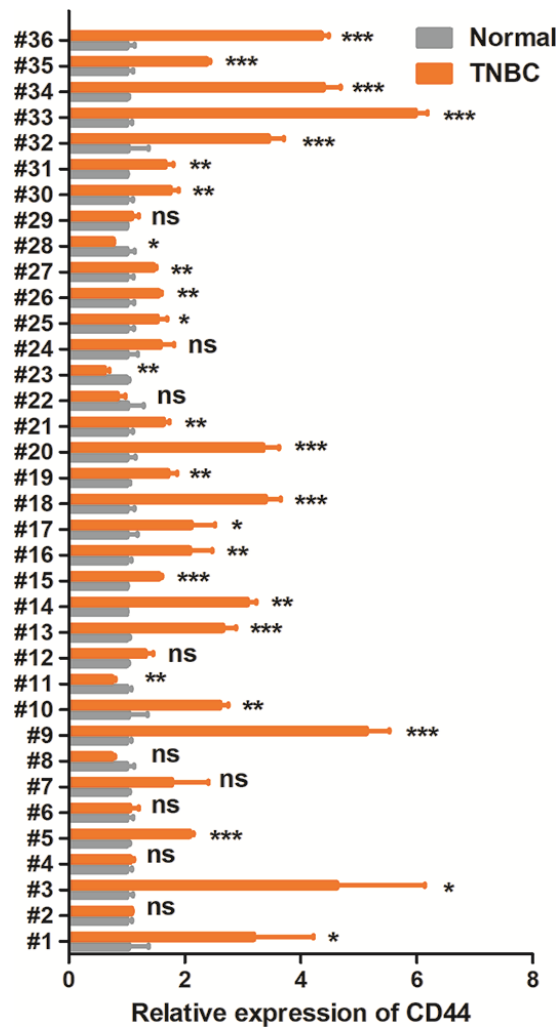

Supplementary Figure 2. Relative expression of CD44 in TNBC tissues and adjacent non-tumor tissues was detected by qRT-PCR.

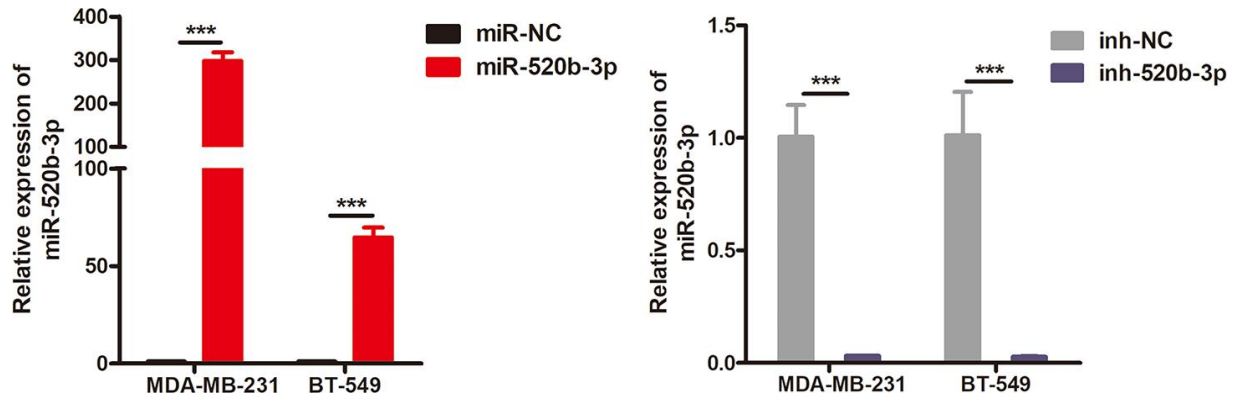

Supplementary Figure 3. The miR-520b-3p expression level was determined in TNBC cells transfected with miR-520b-3p mimics and miR-520b-3p inhibitors by qRT-PCR.
